# Supplementary material
Source: PubMed Central journal article supplement (PMC4131351)
Supplement: 13659_2014_26_MOESM1_ESM.pdf [file 13659_2014_26_MOESM1_ESM.pdf]

## Supporting Information

### Highly Oxygenated Limonoids and Lignans from *Phyllanthus flexuosus*

Jian-Qiang Zhao,<sup>a,b,d</sup> Yan-Ming Wang,<sup>a,b,d</sup> Hong-Tao Zhu,<sup>a</sup> Dong Wang,<sup>a</sup> Rong-Rong Cheng,<sup>a</sup> Chong-Ren Yang,<sup>a</sup> Yi-Fei Wang,<sup>c</sup> Min Xu,<sup>a\*</sup> and Ying-Jun Zhang<sup>a\*</sup>

#### Affiliation

<sup>a</sup> State Key Laboratory of Phytochemistry and Plant Resources in West China, Kunming Institute of Botany, Chinese Academy of Sciences, Kunming 650201, People's Republic of China

<sup>b</sup> University of Chinese Academy of Sciences, Beijing 100049, People's Republic of China

<sup>c</sup> Guangzhou Jinan Biomedicine Research & Development Center, Guangzhou 510632, People's Republic of China

<sup>d</sup> The authors contributed equally to this paper

#### Correspondence

Prof. Dr. Ying-Jun Zhang, State Key Laboratory of Phytochemistry and Plant Resources in West China, Kunming Institute of Botany, Chinese Academy of Sciences, Kunming 650201, China. E-mail: [zhangyj@mail.kib.ac.cn](mailto:zhangyj@mail.kib.ac.cn). Tel/Fax: +86-871-65223235

Assoc. Prof. Dr. Min Xu, State Key Laboratory of Phytochemistry and Plant Resources in West China, Kunming Institute of Botany, Chinese Academy of Sciences, Kunming 650201, China. E-mail: [xumin@mail.kib.ac.cn](mailto:xumin@mail.kib.ac.cn). Tel/ Fax: +86-871-65223235

1. Fig. 1S Key  $^1\text{H}$ - $^1\text{H}$  COSY, HMBC and ROESY correlations of flexuosoid B (**2**)
2. Fig. 2S Key HMBC correlations of phyllanthusmins E (**4**) and F (**5**)
3. Acid hydrolysis of compounds **3-5**
4. Acetylation of compounds **1** and **2**
5. Physicochemical and spectroscopic data of compounds **1a** and **1b**
6. Table 1S  $^{13}\text{C}$  NMR Spectroscopic Data of compounds **1a** and **1b** (methanol- $d_4$ ,  $\delta$  in ppm)
7. Table 2S  $^1\text{H}$  NMR Spectroscopic Data of compounds **1a** and **1b** (methanol- $d_4$ ,  $\delta$  in ppm)
8. Fig. S3  $^1\text{H}$  NMR spectrum of flexuosoid A (**1**) in methanol- $d_4$
9. Fig. 4S  $^{13}\text{C}$  NMR and DEPT spectra of flexuosoid A (**1**) in methanol- $d_4$
10. Fig. 5S HSQC spectrum of flexuosoid A (**1**) in methanol- $d_4$
11. Fig. 6S  $^1\text{H}$ - $^1\text{H}$  COSY spectrum for flexuosoid A (**1**) in methanol- $d_4$
12. Fig. 7S HMBC spectrum of flexuosoid A (**1**) in methanol- $d_4$
13. Fig. 8S ROESY spectrum of flexuosoid A (**1**) in methanol- $d_4$
14. Fig. 9S  $^1\text{H}$  NMR spectrum of flexuosoid B (**2**) in methanol- $d_4$
15. Fig. 10S  $^{13}\text{C}$  NMR and DEPT spectra of flexuosoid B (**2**) in methanol- $d_4$
16. Fig. 11S HSQC spectrum of flexuosoid B (**2**) in methanol- $d_4$
17. Fig. 12S  $^1\text{H}$ - $^1\text{H}$  COSY spectrum of flexuosoid B (**2**) in methanol- $d_4$
18. Fig. 13S HMBC spectrum of flexuosoid B (**2**) in methanol- $d_4$
19. Fig. 14S ROESY spectrum of flexuosoid B (**2**) in methanol- $d_4$
20. Fig. 15S  $^1\text{H}$  NMR spectrum of phyllanthusmin D (**3**) in methanol- $d_4$
21. Fig. 16S  $^{13}\text{C}$  NMR and DEPT spectra of phyllanthusmin D (**3**) in methanol- $d_4$
22. Fig. 17S HSQC spectrum of phyllanthusmin D (**3**) in methanol- $d_4$
23. Fig. 18S  $^1\text{H}$ - $^1\text{H}$  COSY spectrum of phyllanthusmin D (**3**) in methanol- $d_4$
24. Fig. 19S HMBC spectrum of phyllanthusmin D (**3**) in methanol- $d_4$
25. Fig. 20S ROESY spectrum of phyllanthusmin D (**3**) in methanol- $d_4$
26. Fig. 21S  $^1\text{H}$  NMR spectrum of phyllanthusmin E (**4**) in methanol- $d_4$
27. Fig. 22S  $^{13}\text{C}$  NMR and DEPT spectra of phyllanthusmin E (**4**) in methanol- $d_4$
28. Fig. 23S HSQC spectrum of phyllanthusmin E (**4**) in methanol- $d_4$
29. Fig. 24S HMBC spectrum of phyllanthusmin E (**4**) in methanol- $d_4$
30. Fig. 25S ROESY spectrum of phyllanthusmin E (**4**) in methanol- $d_4$
31. Fig. 26S  $^1\text{H}$  NMR spectrum of phyllanthusmin F (**5**) in pyridine- $d_5$
32. Fig. 27S  $^{13}\text{C}$  NMR and DEPT spectra of phyllanthusmin F (**5**) in pyridine- $d_5$
33. Fig. 28S HSQC spectrum of phyllanthusmin F (**5**) in pyridine- $d_5$
34. Fig. 29S  $^1\text{H}$ - $^1\text{H}$  COSY spectrum of phyllanthusmin F (**5**) in pyridine- $d_5$
35. Fig. 30S HMBC spectrum of phyllanthusmin F (**5**) in pyridine- $d_5$
36. Fig. 31S ROESY spectrum of phyllanthusmin F (**5**) in pyridine- $d_5$
37. Fig. 32S  $^1\text{H}$  NMR spectrum of 1,2,3,7,28,30-hexa-acetyl flexuosoid A (**1a**) in methanol- $d_4$
38. Fig. 33S  $^{13}\text{C}$  NMR and DEPT spectra of 1,2,3,7,28,30-hexa-acetyl flexuosoid A (**1a**) in methanol- $d_4$
39. Fig. 34S HSQC spectrum of 1,2,3,7,28,30-hexa-acetyl flexuosoid A (**1a**) in methanol- $d_4$
40. Fig. 35S  $^1\text{H}$ - $^1\text{H}$  COSY spectrum of 1,2,3,7,28,30-hexa-acetyl flexuosoid A (**1a**) in methanol- $d_4$
41. Fig. 36S HMBC spectrum of 1,2,3,7,28,30-hexa-acetyl flexuosoid A (**1a**) in methanol- $d_4$
42. Fig. 37S ROESY spectrum of 1,2,3,7,28,30-hexa-acetyl flexuosoid A (**1a**) in methanol- $d_4$
43. Fig. 38S  $^1\text{H}$  NMR spectrum of 2,3,7,28,30-penta-acetyl flexuosoid A (**1b**) in methanol- $d_4$
44. Fig. 39S  $^{13}\text{C}$  NMR and DEPT spectra of 2,3,7,28,30-penta-acetyl flexuosoid A (**1b**) in methanol- $d_4$
45. Fig. 40S HSQC spectrum of 2,3,7,28,30-penta-acetyl flexuosoid A (**1b**) in methanol- $d_4$
46. Fig. 41S  $^1\text{H}$ - $^1\text{H}$  COSY spectrum of 2,3,7,28,30-penta-acetyl flexuosoid A (**1b**) in methanol- $d_4$
47. Fig. 42S HMBC spectrum of 2,3,7,28,30-penta-acetyl flexuosoid A (**1b**) in methanol- $d_4$
48. Fig. 43S ROESY spectrum of 2,3,7,28,30-penta-acetyl flexuosoid A (**1b**) in methanol- $d_4$

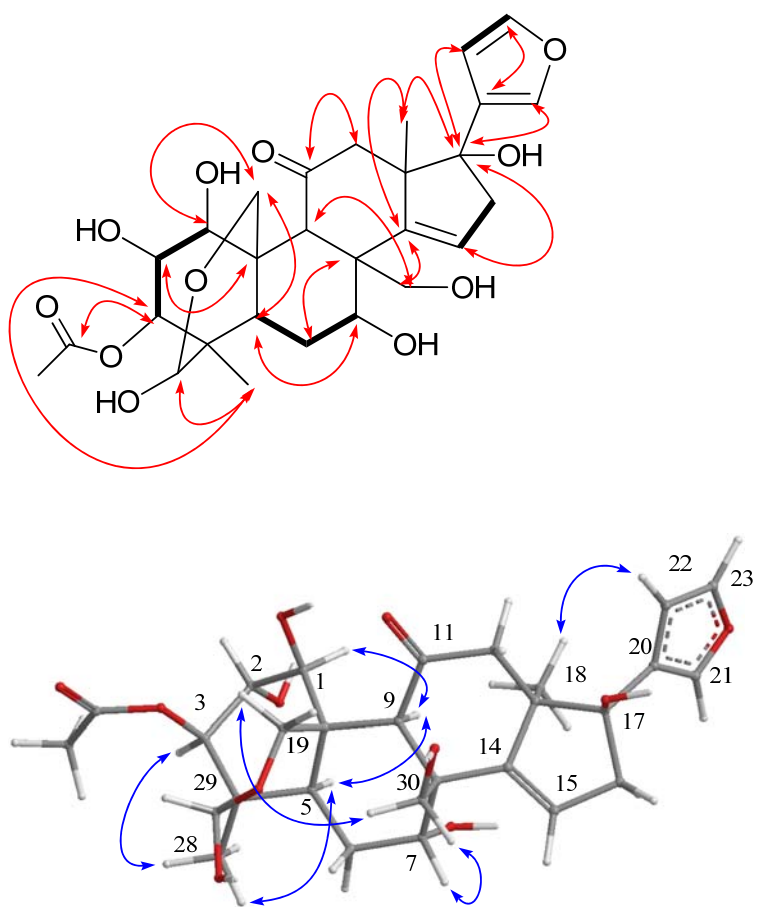

Fig. 1S Key  $^1\text{H}$ - $^1\text{H}$  COSY (—), HMBC (→) and ROESY (↔) correlations of flexuosoid B (2)

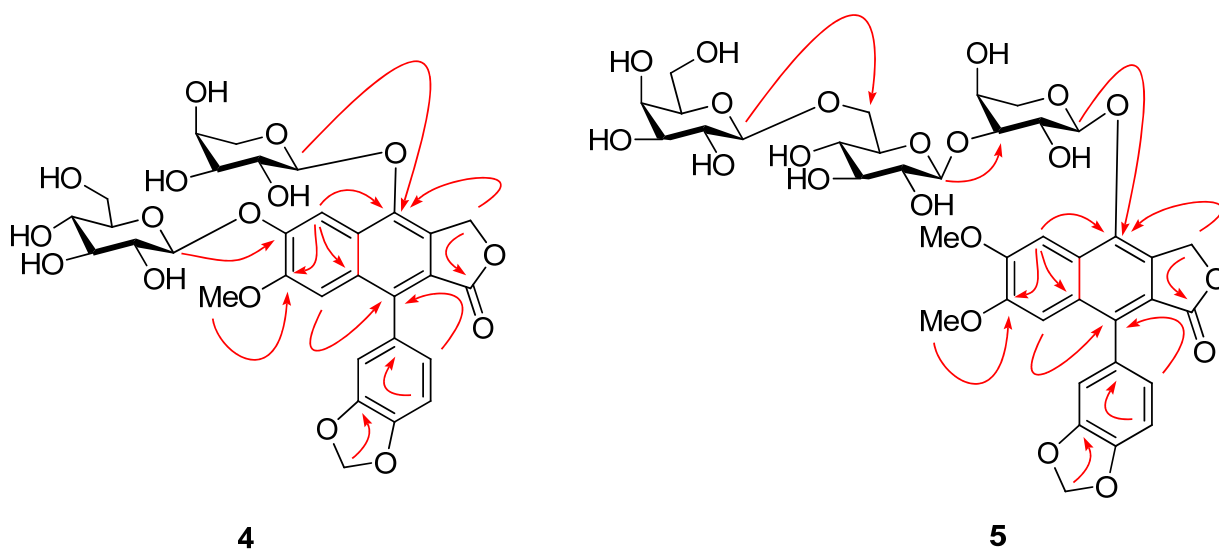

**Fig. 2S** Key HMBC (→) correlations of phyllanthusmins E (4) and F (5)

### **Acid hydrolysis of compounds 3-5**

Compounds **3-5** (each 3 mg) in 2 M HCl-dioxane (1:1, v/v, 5 mL) were heated at 85°C in a water bath for 8 h, respectively. The reaction mixtures were partitioned between H<sub>2</sub>O and CHCl<sub>3</sub> (2 mL × 3) four times. The aqueous layer was neutralized with 2 M NaOH and then dried to give a saccharide mixture. Solutions of the sugar residues of these compounds in pyridine (2 mL) were added to L-cysteine methyl ester hydrochloride (1.5 mg) and kept at 60°C for 1 h. Trimethylsilylimidazole (1.5 mL) was added to the reaction mixtures, and they kept at 60°C for 30 min. The supernatants (4 μL) were analyzed by GC, respectively. The saccharides of compounds **3-5** were determined by comparison of the retention times of the corresponding derivatives with those of the standard saccharides, of which retention times of D-galactose, L-arabinose and D-glucose are 22.229, 16.591, and 21.746 min, respectively. The monosaccharide of **3** was determined to be L-arabinose (16.588 min), while the monosaccharides of **4** were L-arabinose (16.459 min) and D-glucose (21.787 min). The monosaccharides of **5** were determined to be L-arabinose (16.233 min), D-glucose (21.516 min) and D-galactose (22.141 min).

### Acetylation of compounds **1** and **2**

Compound **1** (9.2 mg, 0.0182 mmol) was added to the mixture of DMAP (2.2 mg, 0.0182 mmol) and Et<sub>3</sub>N (76  $\mu$ l, 0.545mmol) in 2 ml anhydrous DCM in ice-bath, and then Ac<sub>2</sub>O (51.5  $\mu$ l, 0.0545 mmol) was added to the mixture under Ar. The reaction mixture was stirred at 0°C. After 24 h the solution was evaporated to dryness. The residue was applied to semi-preparative HPLC to furnish compounds **1a** (3.9 mg) in 30% yield and **1b** (3.6 mg) in 27% yield. In the same way, compound **2** (18.0 mg, 0.0328 mmol) was acetylated, to give the same adducts **1a** (7.6 mg) in 31% yield and **1b** (7.0 mg) in 28% yield, as those of **1**.

**1,2,3,7,29,30-hexa-acetyl flexuosoid A (1a):** white amorphous powder;  $[\alpha]_D^{16.4}$  -53.4 (*c* 0.09, MeOH); UV (MeOH)  $\lambda_{\max}$  (log  $\epsilon$ ) 203.6 (3.93), 260.4 (2.76) nm; IR (KBr)  $\nu_{\max}$  3468, 2971, 2930, 1747, 1374, 1230, 1256, 1054  $\text{cm}^{-1}$ ;  $^1\text{H}$  and  $^{13}\text{C}$  NMR data, see Tables **1S** and **2S**; EI MS (pos. ion mode)  $m/z$  758  $[\text{M}]^+$ ; positive HR EIMS  $m/z$  758.2791  $[\text{M}]^+$  (calcd for  $\text{C}_{38}\text{H}_{46}\text{O}_{16}$ , 758.2786).

**2,3,7,29,30-penta-acetyl flexuosoid A (1b):** white amorphous powder;  $[\alpha]_D^{16.6}$  -62.0 (*c* 0.11, MeOH); UV (MeOH)  $\lambda_{\max}$  (log  $\epsilon$ ) 203.8 (3.93) nm; IR (KBr)  $\nu_{\max}$  3478, 2971, 2934, 1745, 1432, 1231, 1054  $\text{cm}^{-1}$ ;  $^1\text{H}$  and  $^{13}\text{C}$  NMR data, see Tables **1S** and **2S**; EI MS (neg. ion mode)  $m/z$  716  $[\text{M}]^+$ ; positive HR EIMS  $m/z$  716.2667  $[\text{M}]^+$  (calcd for  $\text{C}_{36}\text{H}_{44}\text{O}_{15}$ , 716.2680).

Table 1S <sup>13</sup>C NMR Spectroscopic Data of **1a** and **1b** (methanol-*d*<sub>4</sub>, δ in ppm)

|             | <b>1a</b> <sup>a</sup> | <b>1b</b> <sup>a</sup> |
|-------------|------------------------|------------------------|
| 1           | 73.7, CH               | 71.3, CH               |
| 2           | 68.7, CH               | 70.7, CH               |
| 3           | 73.2, CH               | 73.6, CH               |
| 4           | 41.7, C                | 41.7, C                |
| 5           | 31.2, CH               | 30.4, CH               |
| 6           | 24.0, CH <sub>2</sub>  | 24.1, CH <sub>2</sub>  |
| 7           | 71.8, CH               | 71.9, CH               |
| 8           | 48.0, C                | 47.7, C                |
| 9           | 46.6, CH               | 46.7, CH               |
| 10          | 42.0, C                | 43.1, C                |
| 11          | 211.3, C               | 212.7, C               |
| 12          | 44.1, CH <sub>2</sub>  | 44.0, CH <sub>2</sub>  |
| 13          | 52.7, C                | 53.0, C                |
| 14          | 151.1, C               | 151.8, C               |
| 15          | 122.6, CH              | 122.0, CH              |
| 16          | 44.0, CH <sub>2</sub>  | 44.2, CH <sub>2</sub>  |
| 17          | 84.2, C                | 83.1, C                |
| 18          | 26.9, CH <sub>3</sub>  | 26.5, CH <sub>3</sub>  |
| 19          | 64.4, CH <sub>2</sub>  | 65.2, CH <sub>2</sub>  |
| 20          | 129.3, C               | 129.4, C               |
| 21          | 141.2, CH              | 141.1, CH              |
| 22          | 110.6, CH              | 110.7, CH              |
| 23          | 144.5, CH              | 144.4, CH              |
| 28          | 18.6, CH <sub>3</sub>  | 18.7, CH <sub>3</sub>  |
| 29          | 94.8, CH               | 95.1, CH               |
| 30          | 72.6, CH <sub>2</sub>  | 72.8, CH <sub>2</sub>  |
| <u>COMe</u> | 171.7, C               | 171.2, C               |
|             | 171.2, C               | 171.5, C               |
|             | 171.5, C               | 172.9, C               |
|             | 170.8, C               | 171.8, C               |
|             | 171.0, C               | 171.8, C               |
|             | 172.1, C               |                        |
| <u>COMe</u> | 20.5, CH <sub>3</sub>  | 20.5, CH <sub>3</sub>  |
|             | 20.6, CH <sub>3</sub>  | 20.6, CH <sub>3</sub>  |
|             | 20.8, CH <sub>3</sub>  | 20.8, CH <sub>3</sub>  |
|             | 20.8, CH <sub>3</sub>  | 20.8, CH <sub>3</sub>  |
|             | 21.0, CH <sub>3</sub>  | 21.0, CH <sub>3</sub>  |
|             | 21.1, CH <sub>3</sub>  |                        |

<sup>a</sup>Data were measured at 150 MHz.



Table 2S <sup>1</sup>H NMR Spectroscopic Data of **1a** and **1b** (methanol-*d*<sub>4</sub>, δ in ppm)

|      | <b>1a</b> <sup>a</sup> | <b>1b</b> <sup>a</sup> |
|------|------------------------|------------------------|
| 1    | 5.86, d (4.4)          | 4.52 <sup>b</sup>      |
| 2    | 5.92, t (4.4)          | 5.79, t (4.7)          |
| 3    | 5.41, d (4.4)          | 5.45, d (4.7)          |
| 5    | 2.81, dd (14.0, 4.0)   | 2.78, dd (14.2, 4.0)   |
| 6    | 2.13 <sup>b</sup>      | 2.15 <sup>b</sup>      |
|      | 1.88, dt (14.7, 4.0)   | 1.90, dt (14.8, 3.8)   |
| 7    | 5.44, brs              | 5.44, brs              |
| 9    | 3.56, s                | 4.28, s                |
| 12   | 3.45, d (19.4)         | 3.46, d (19.0)         |
|      | 1.95 <sup>b</sup>      | 2.08 <sup>b</sup>      |
| 15   | 5.67, brs              | 5.67, d (1.9)          |
| 16   | 3.15, d (16.5)         | 3.19, dd (16.5, 1.4)   |
|      | 2.46, dd (16.5, 3.4)   | 2.49, dd (16.5, 3.5)   |
| 18   | 0.97, s                | 1.09, s                |
| 19   | 4.65 <sup>b</sup>      | 4.55 <sup>b</sup>      |
|      | 4.11, d (13.2)         | 4.11, d (12.9)         |
| 21   | 7.53, s                | 7.56, s                |
| 22   | 6.41, s                | 6.46, d (1.8)          |
| 23   | 7.46, s                | 7.50, t (1.8)          |
| 28   | 0.83, s                | 0.82, s                |
| 29   | 5.81, s                | 5.82, s                |
| 30   | 4.44, d (11.4)         | 4.49, d (11.3)         |
|      | 4.24, d (11.4)         | 4.24, d (11.3)         |
| COMe | 1.90, s                | 2.01, s                |
|      | 1.96, s                | 2.05, s                |
|      | 2.08, s (x 2)          | 2.10, s                |
|      | 2.11, s                | 2.14, s                |
|      | 2.14, s                | 2.16, s                |

<sup>a</sup>Data were measured at 500 MHz. <sup>b</sup>Overlapping <sup>1</sup>H NMR signals are reported without designated multiplicity.

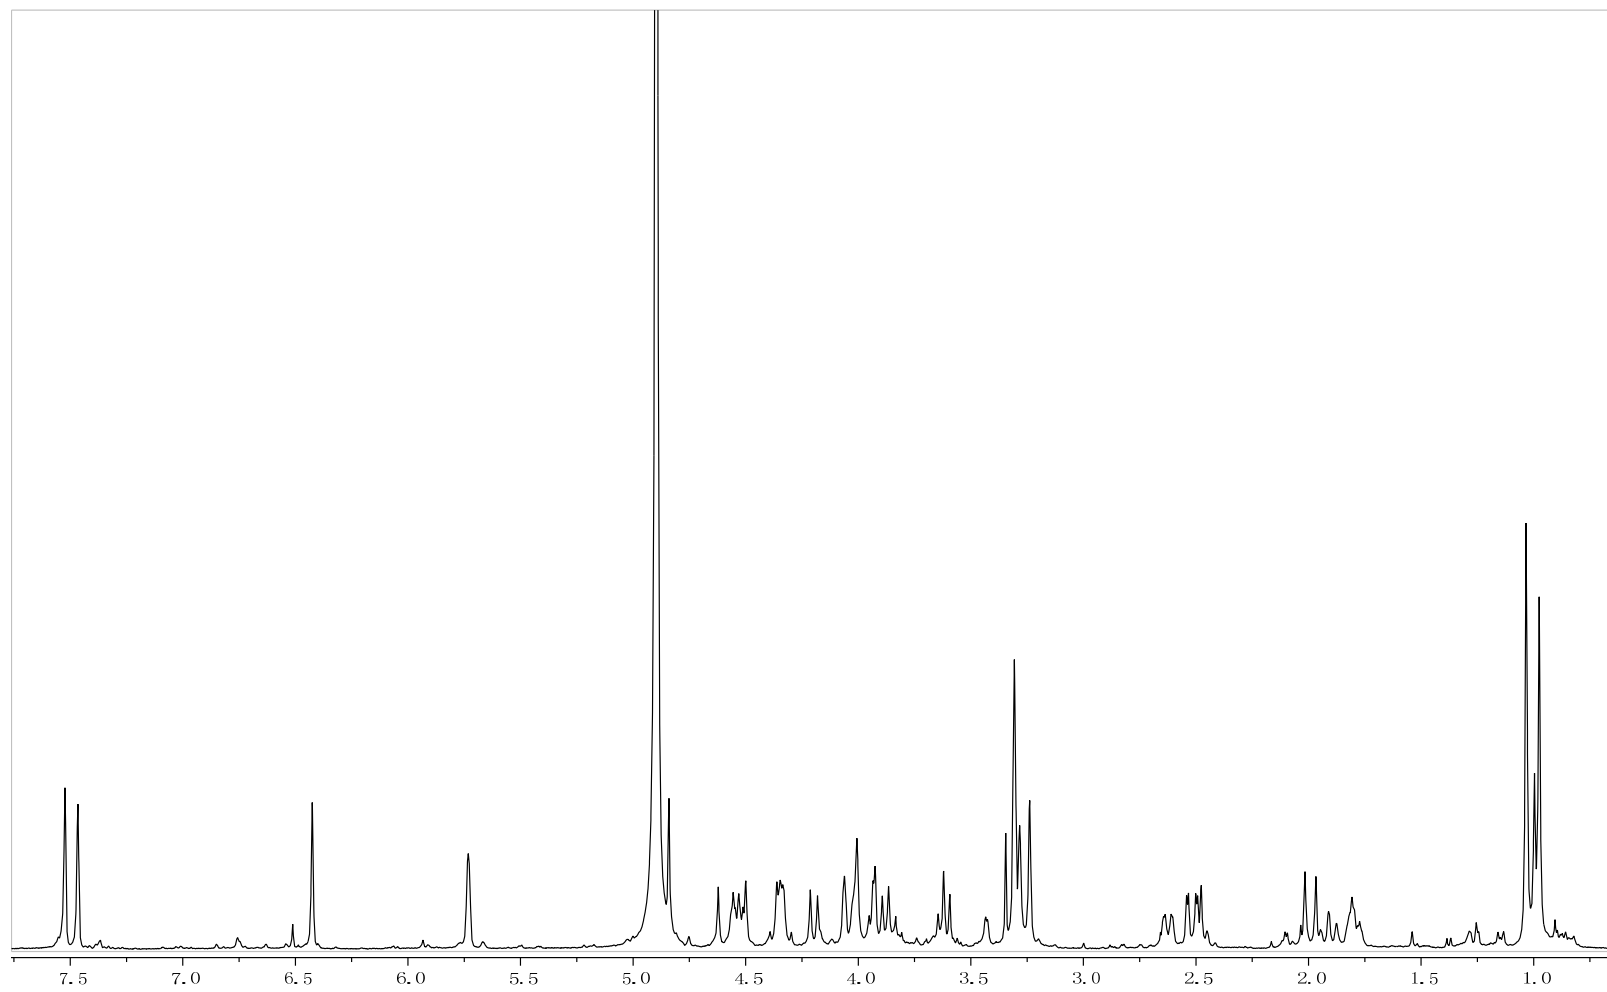

**Fig. 3S**  $^1\text{H}$  NMR spectrum of flexuosoid A (1) in methanol- $d_4$

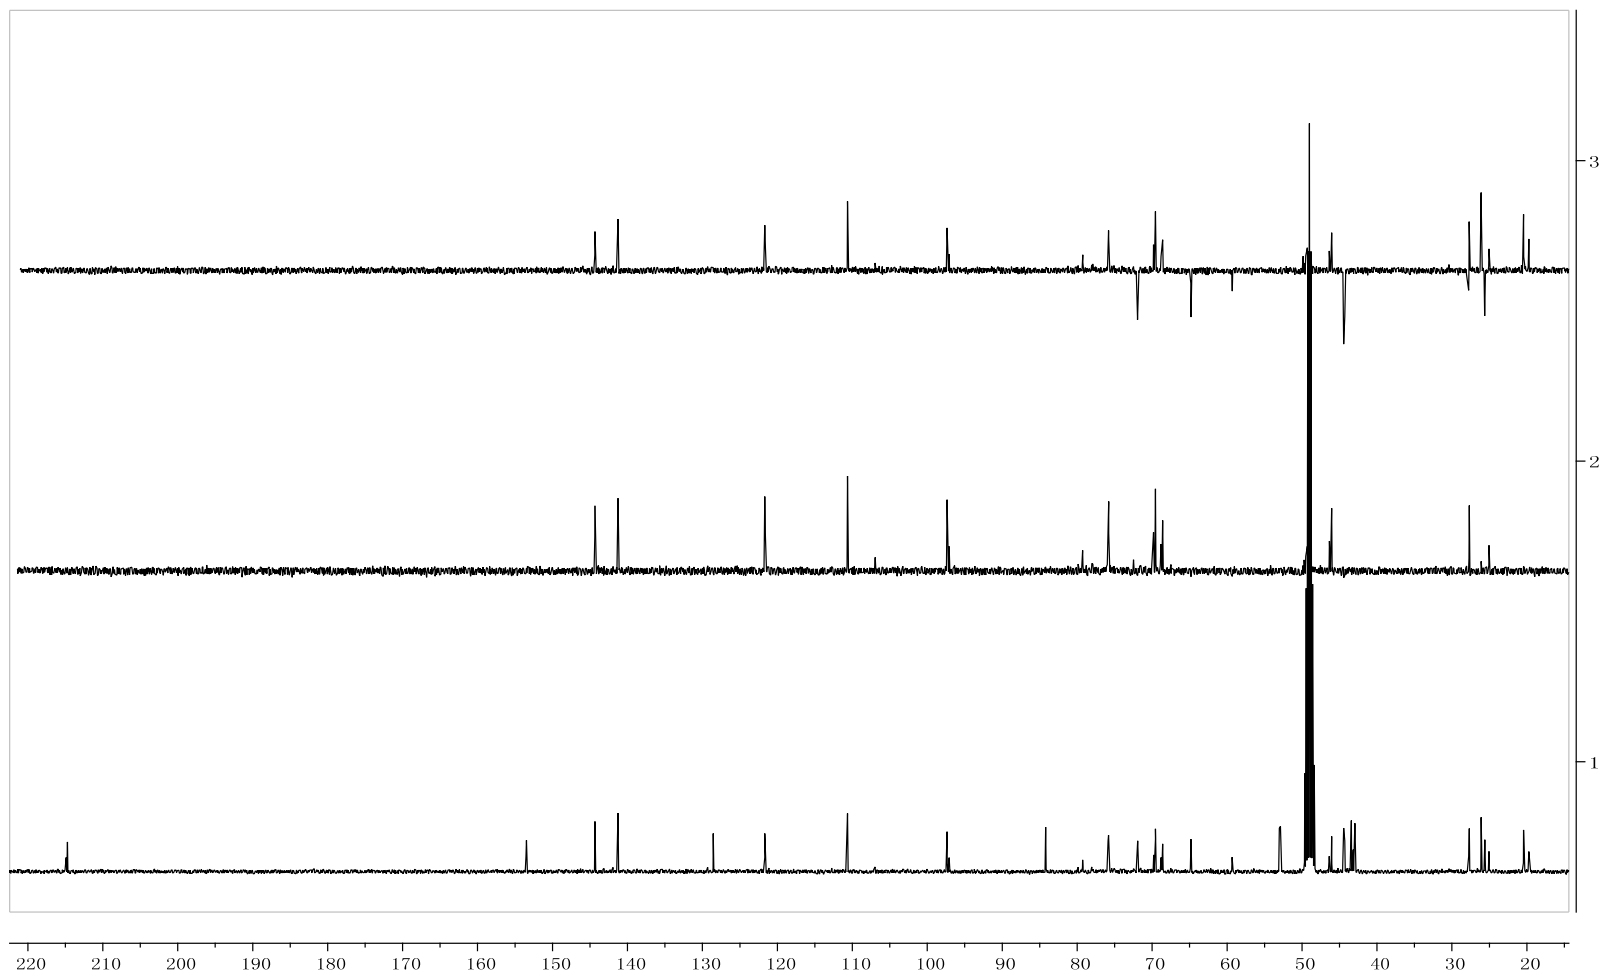

**Fig. 4S**  $^{13}\text{C}$  NMR and DEPT spectra of flexuosoid A (1) in methanol- $d_4$

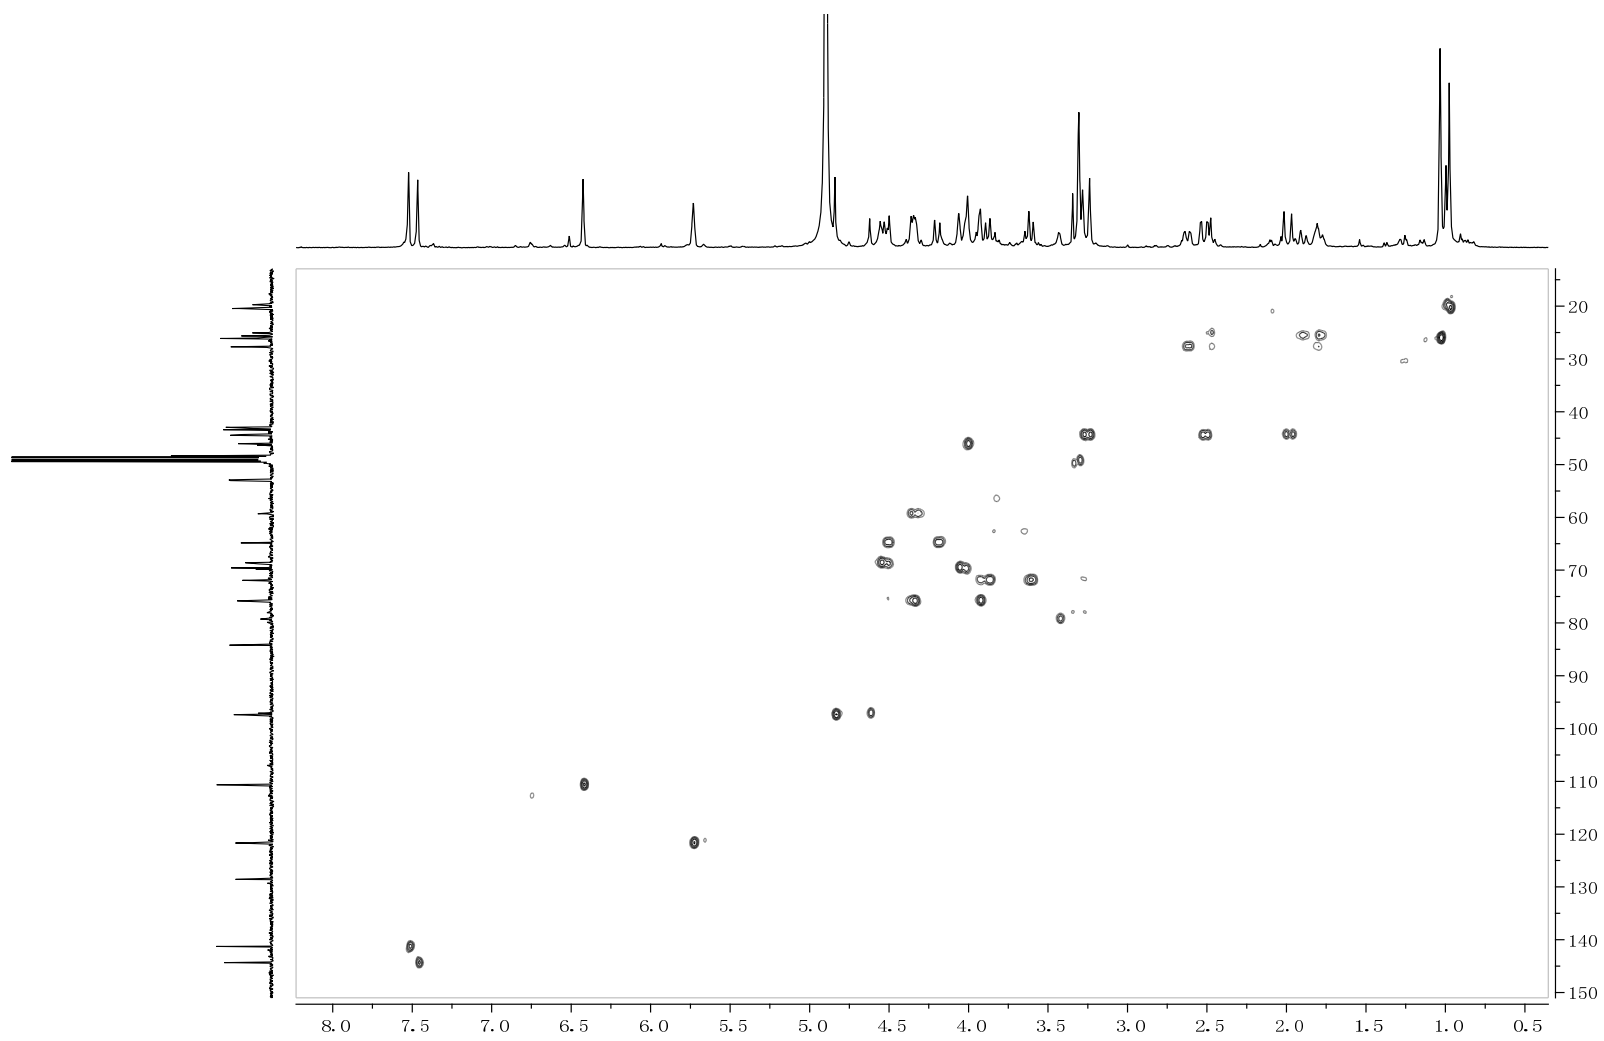

**Fig. 5S HSQC spectrum of flexuosoid A (1) in methanol- $d_4$**

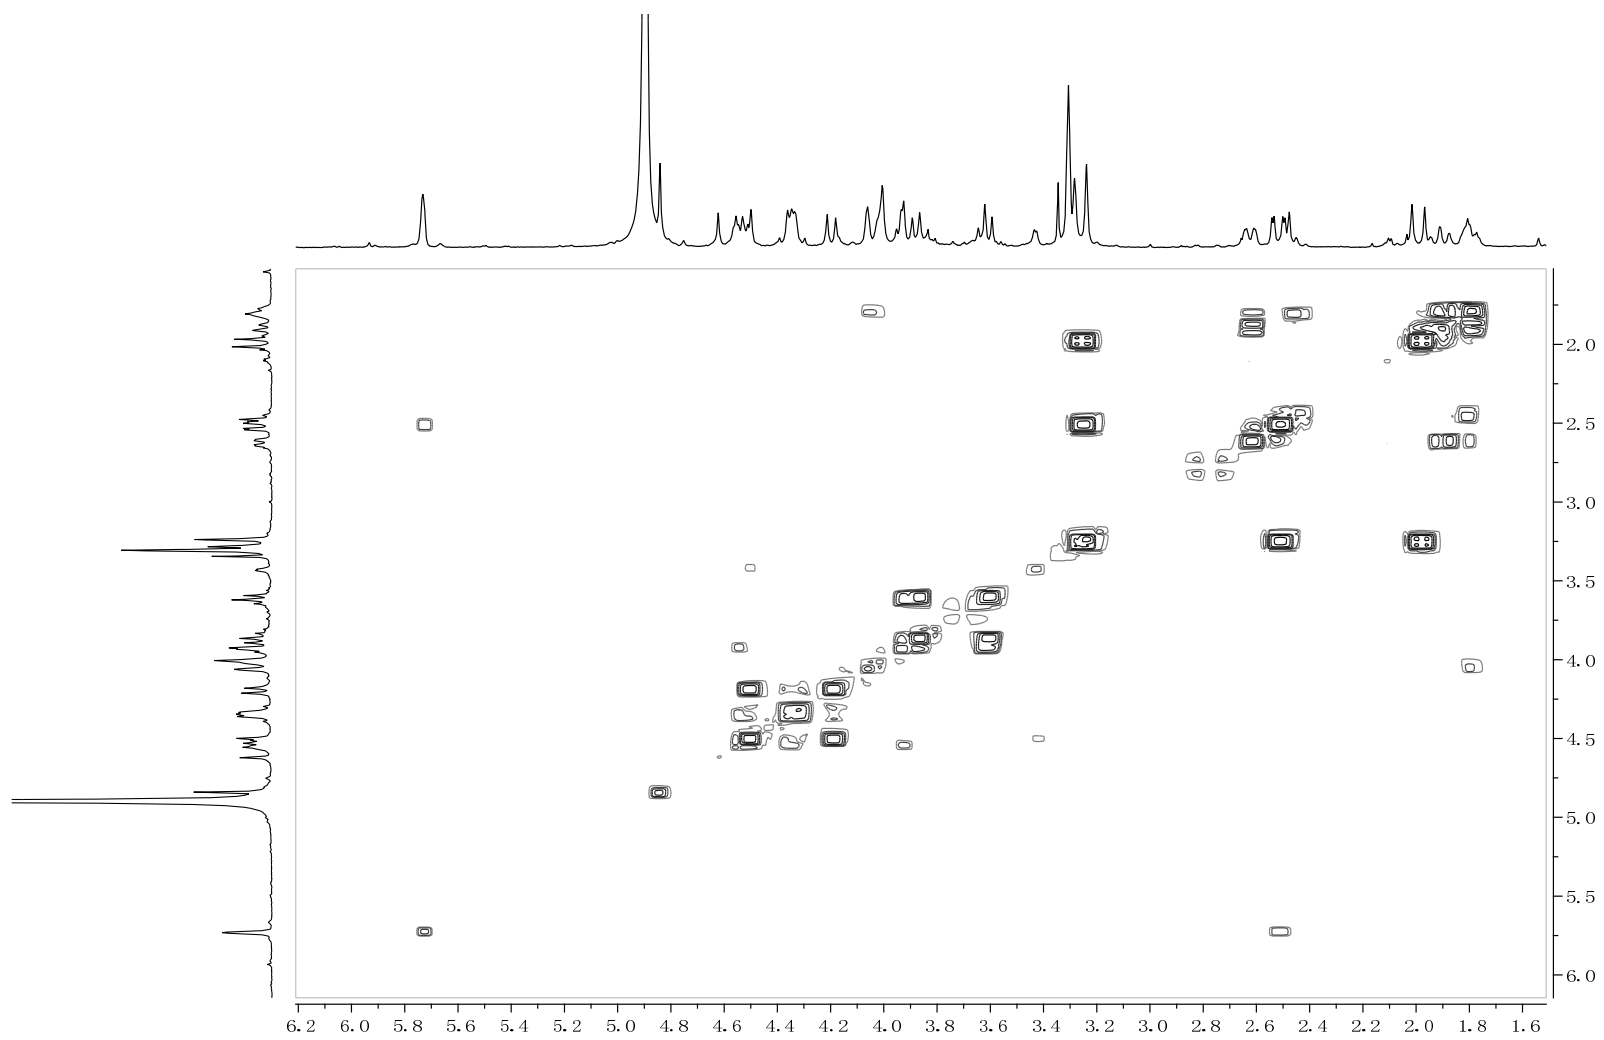

**Fig. 6S**  $^1\text{H}$ - $^1\text{H}$  COSY spectrum for flexuosoid A (1) in methanol- $d_4$

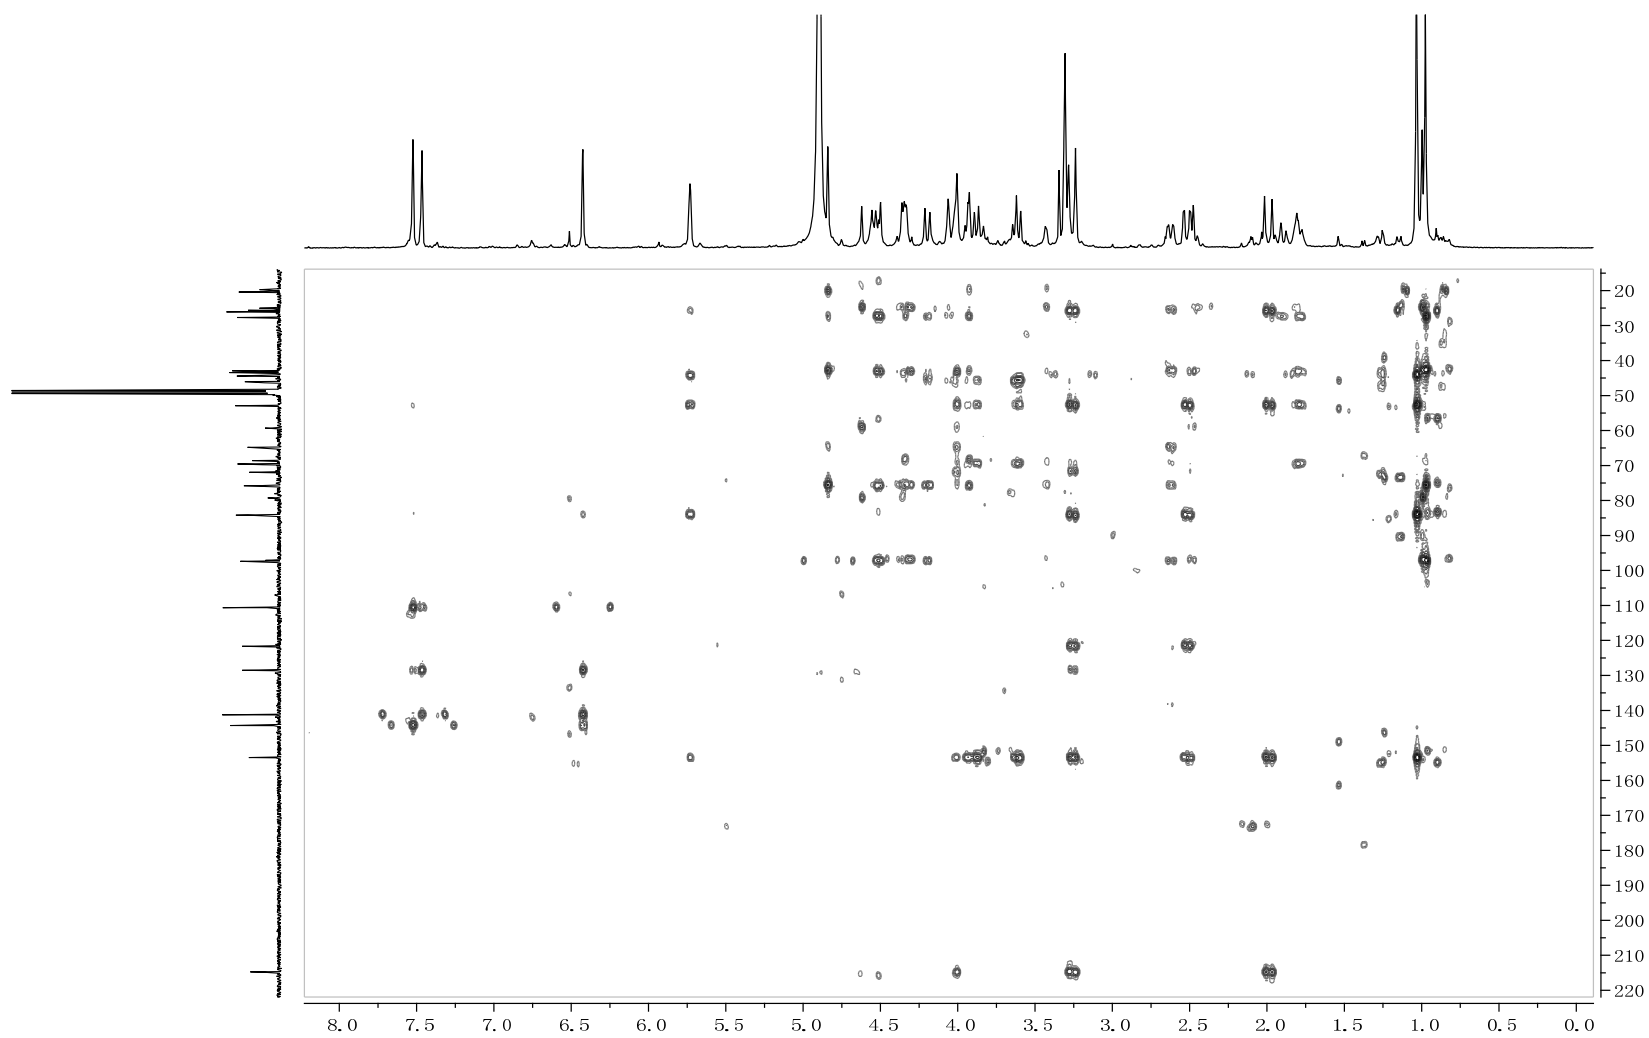

**Fig. 7S** HMBC spectrum of flexuosoid A (1) in methanol- $d_4$

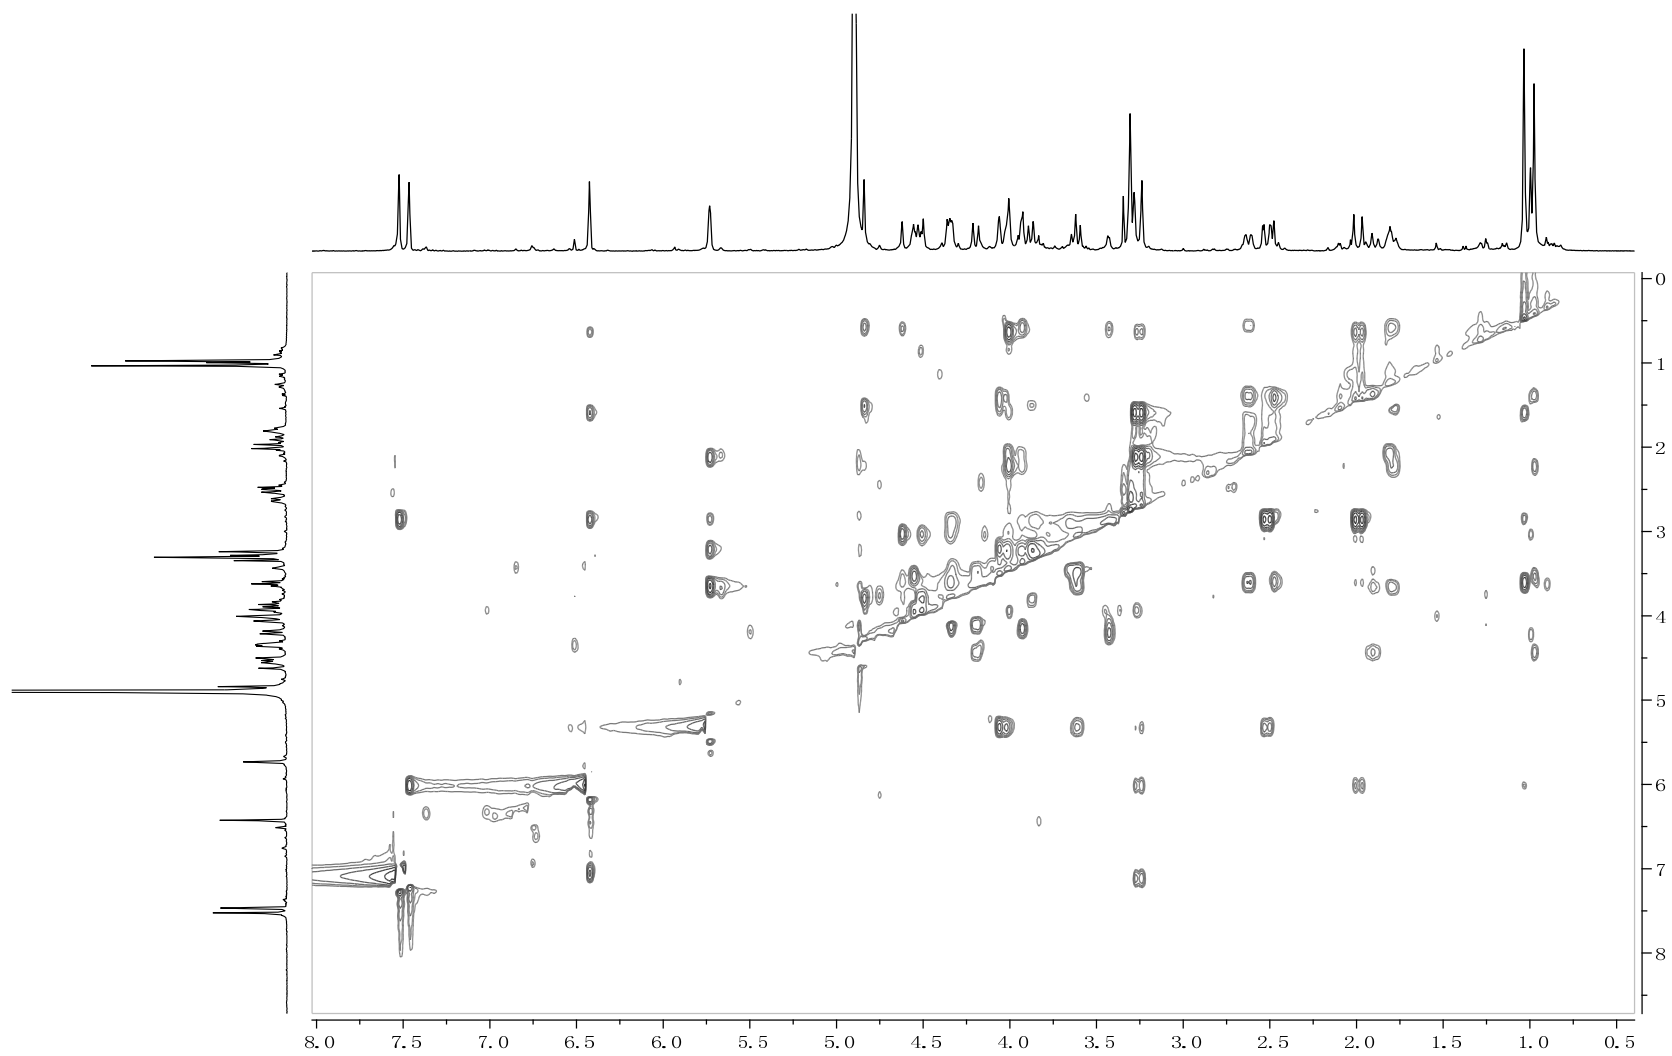

**Fig. 8S** ROESY spectrum of flexuosoid A (1) in methanol- $d_4$

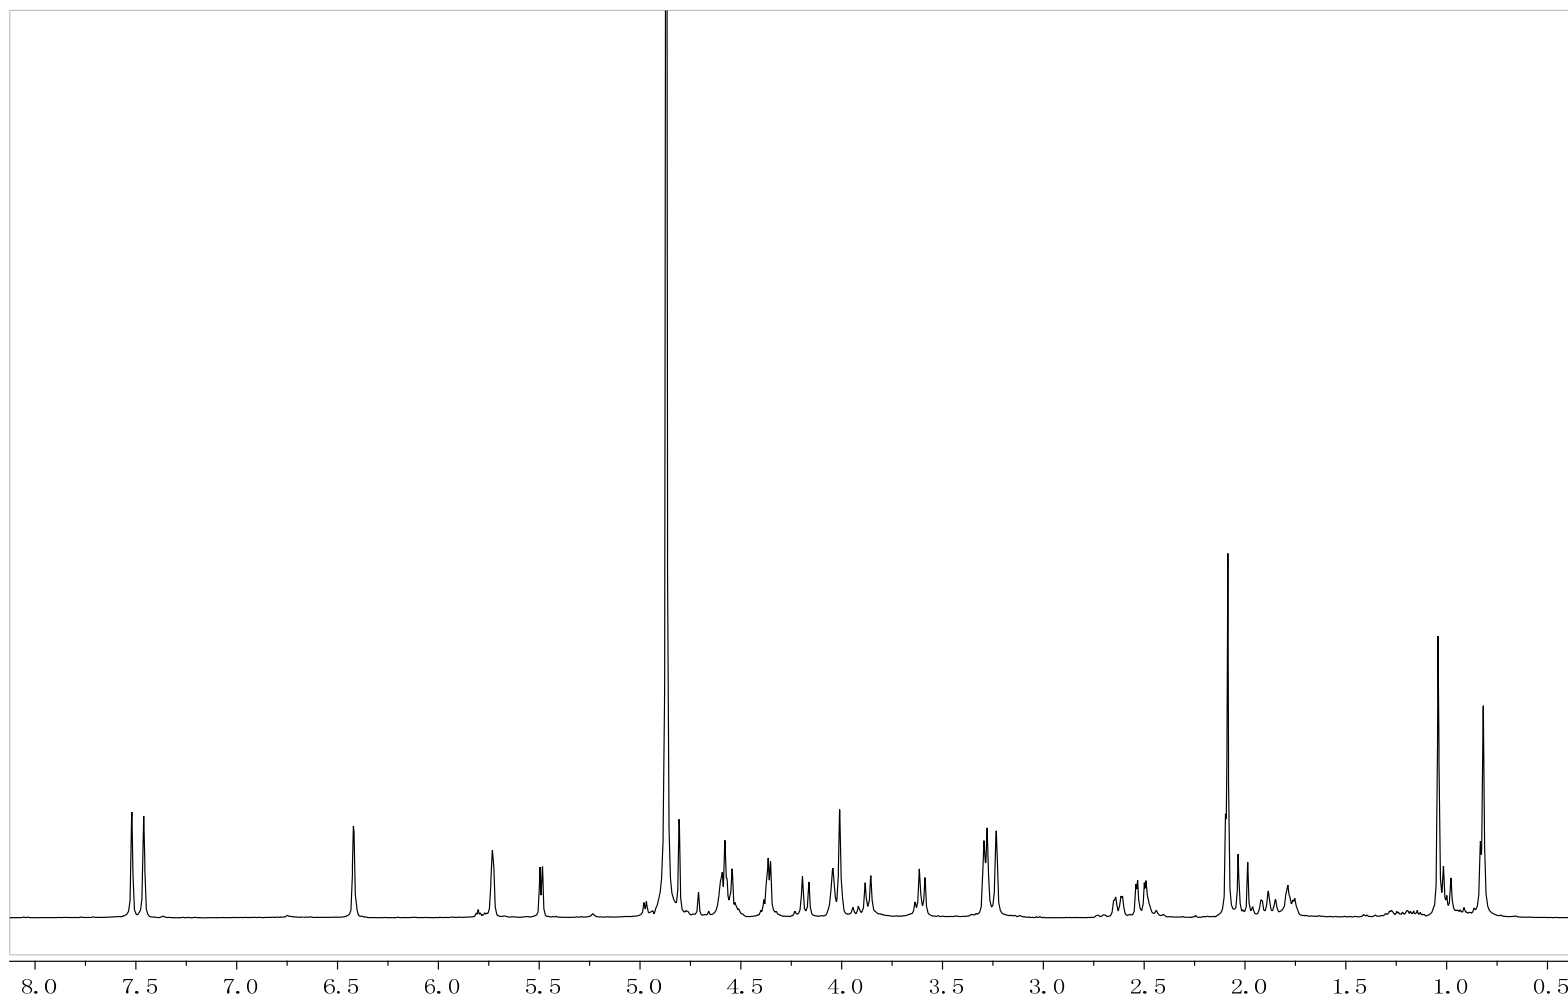

**Fig. 9S**  $^1\text{H}$  NMR spectrum of flexuosoid B (2) in methanol- $d_4$



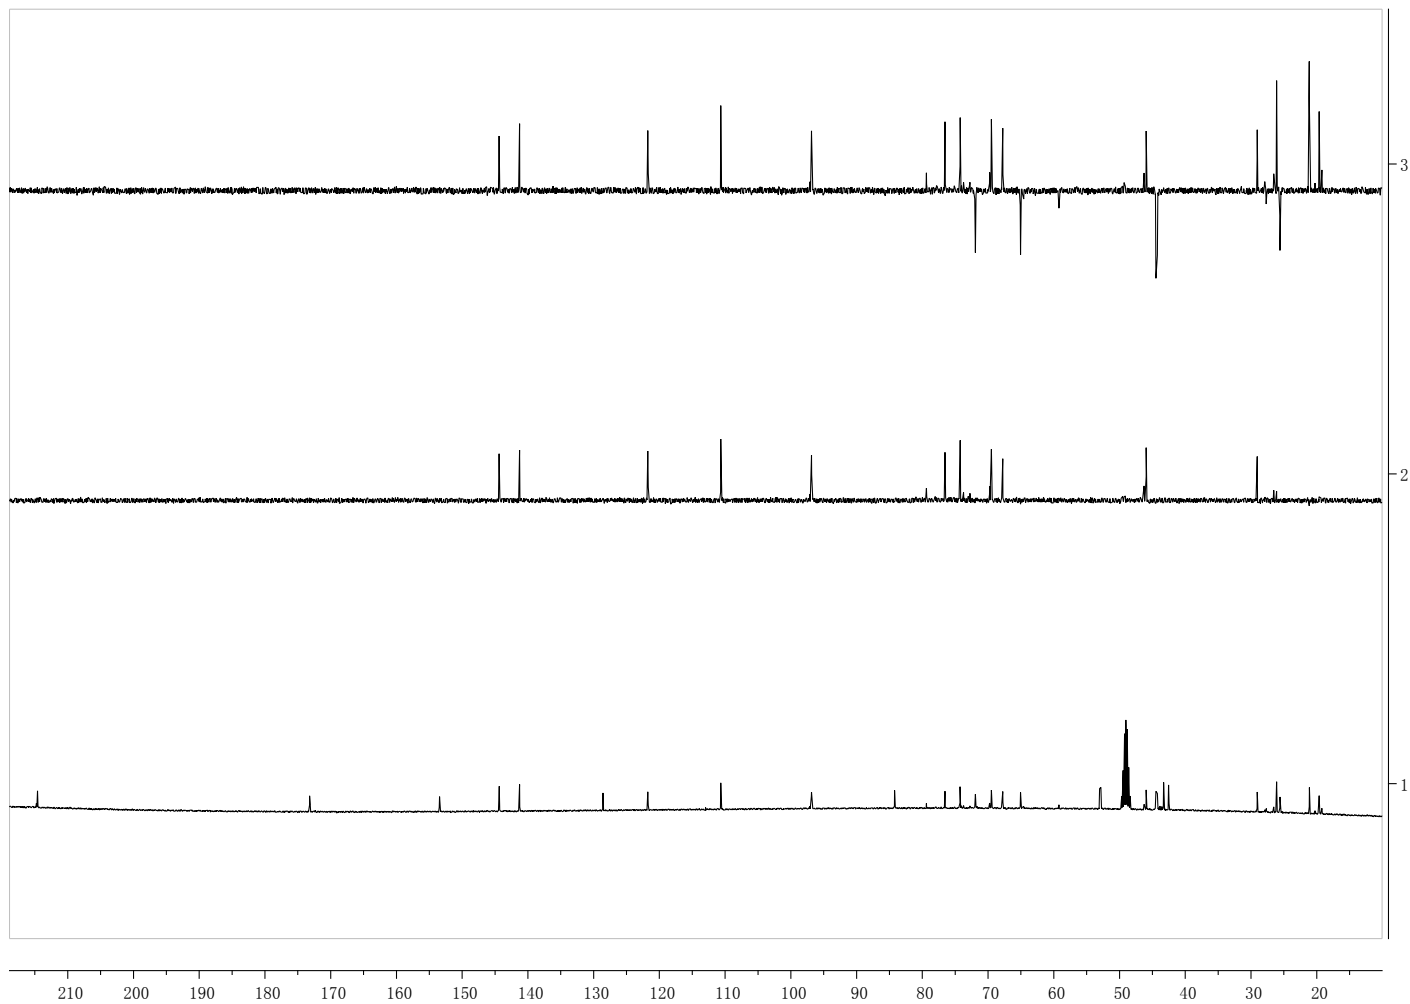

**Fig. 10S**  $^{13}\text{C}$  NMR and DEPT spectra of flexuosoid B (2) in methanol- $d_4$

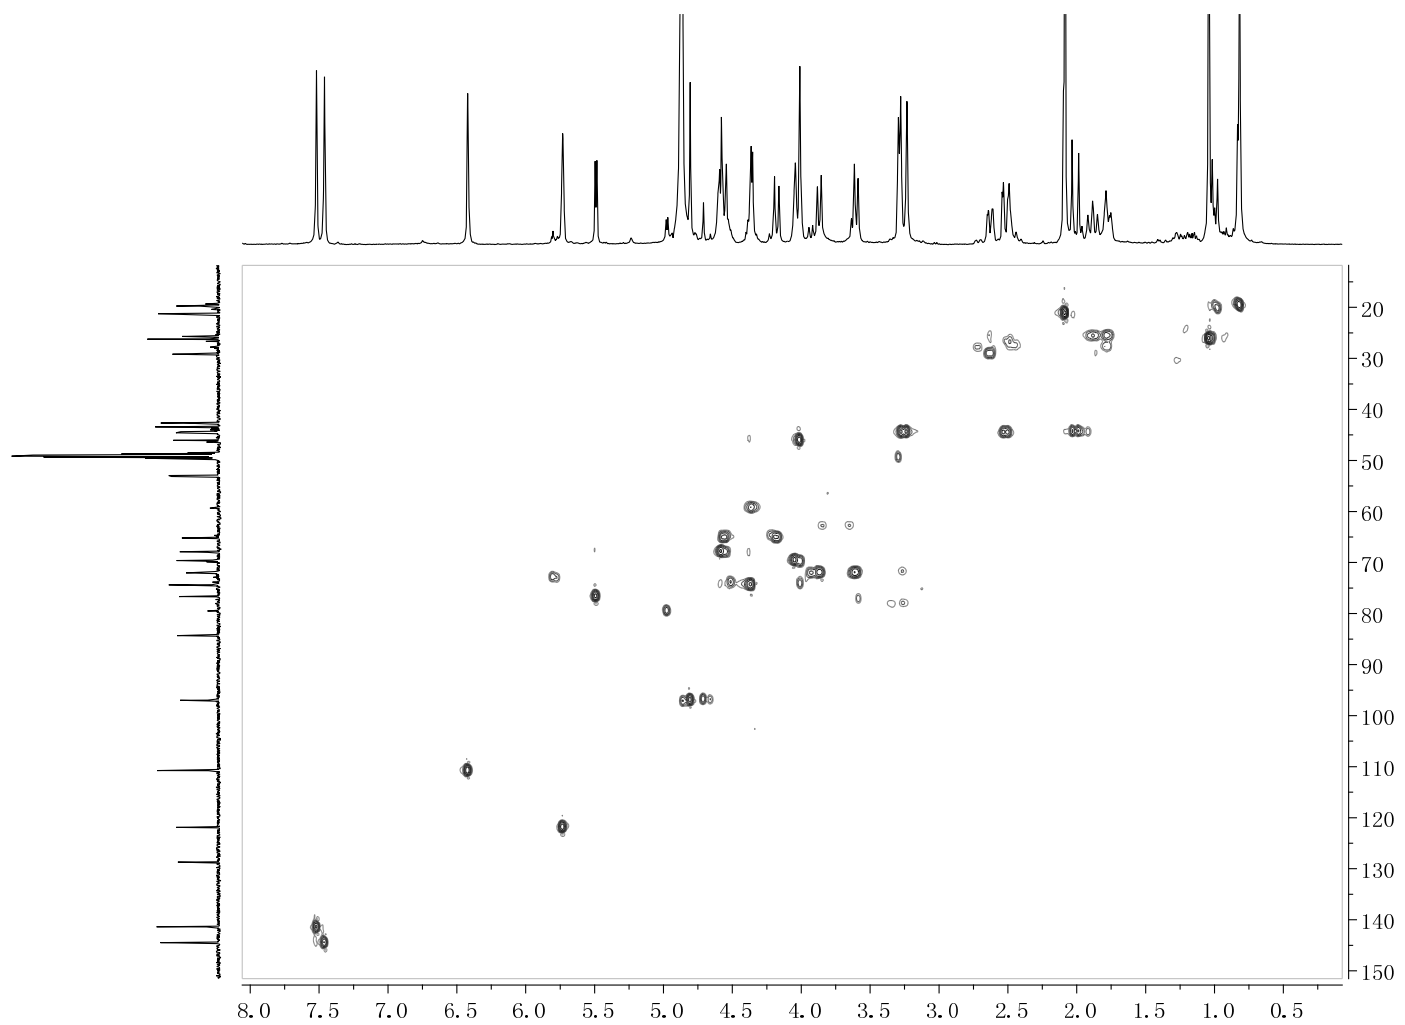

**Fig. 11S HSQC spectrum of flexuosoid B (2) in methanol- $d_4$**

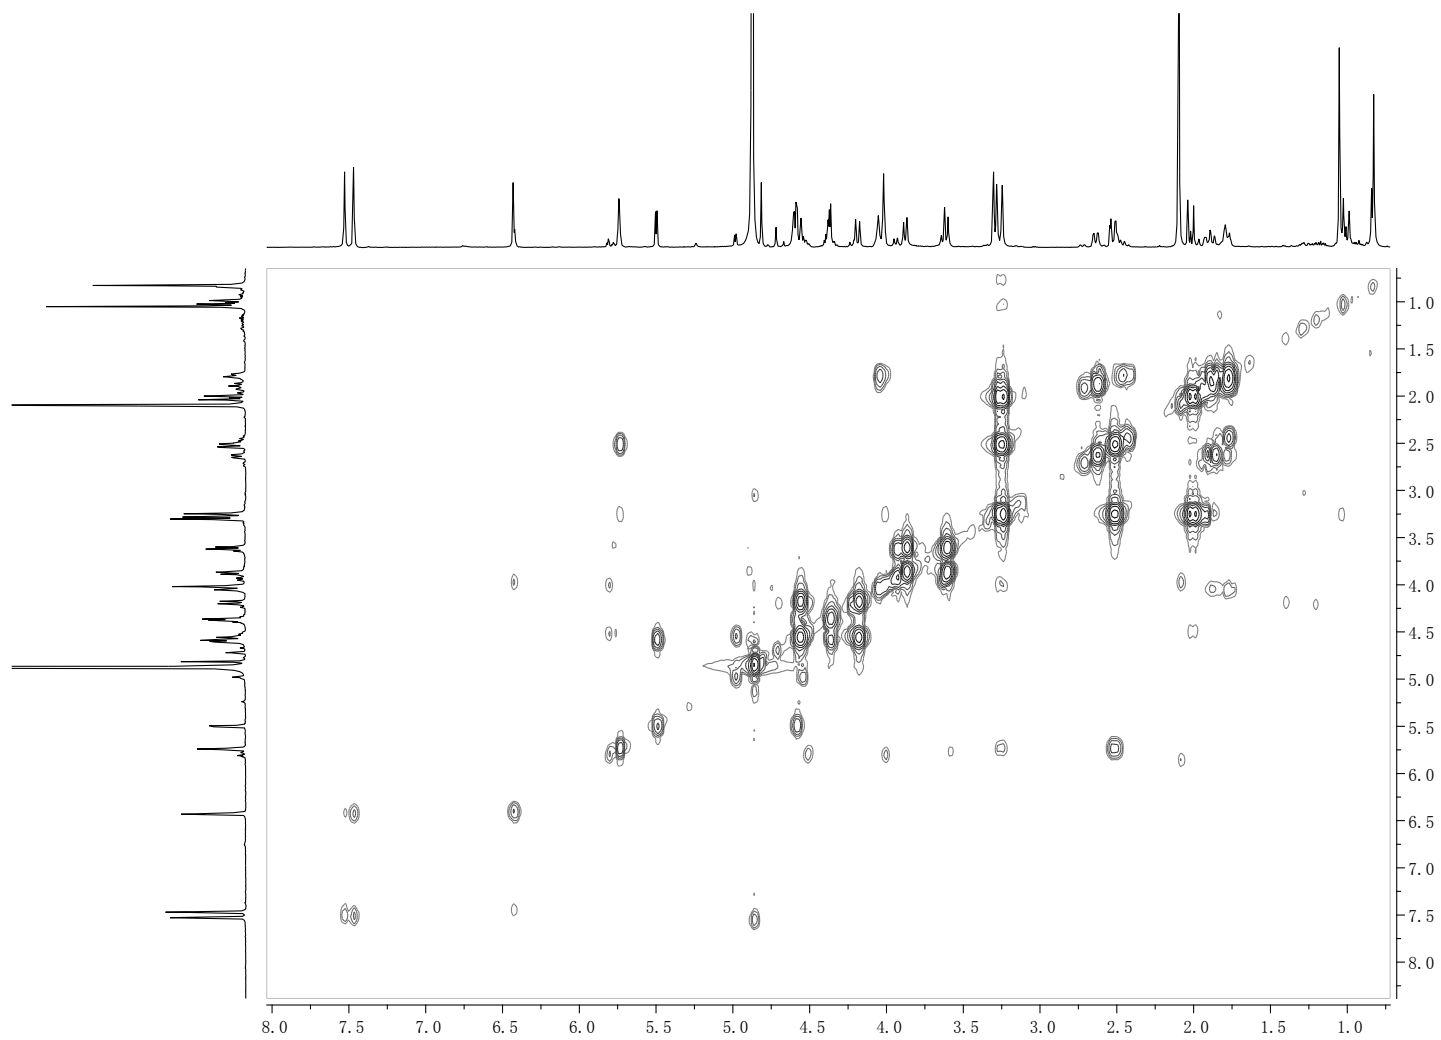

**Fig. 12S**  $^1\text{H}$ - $^1\text{H}$  COSY spectrum of flexuosoid B (2) in methanol- $d_4$

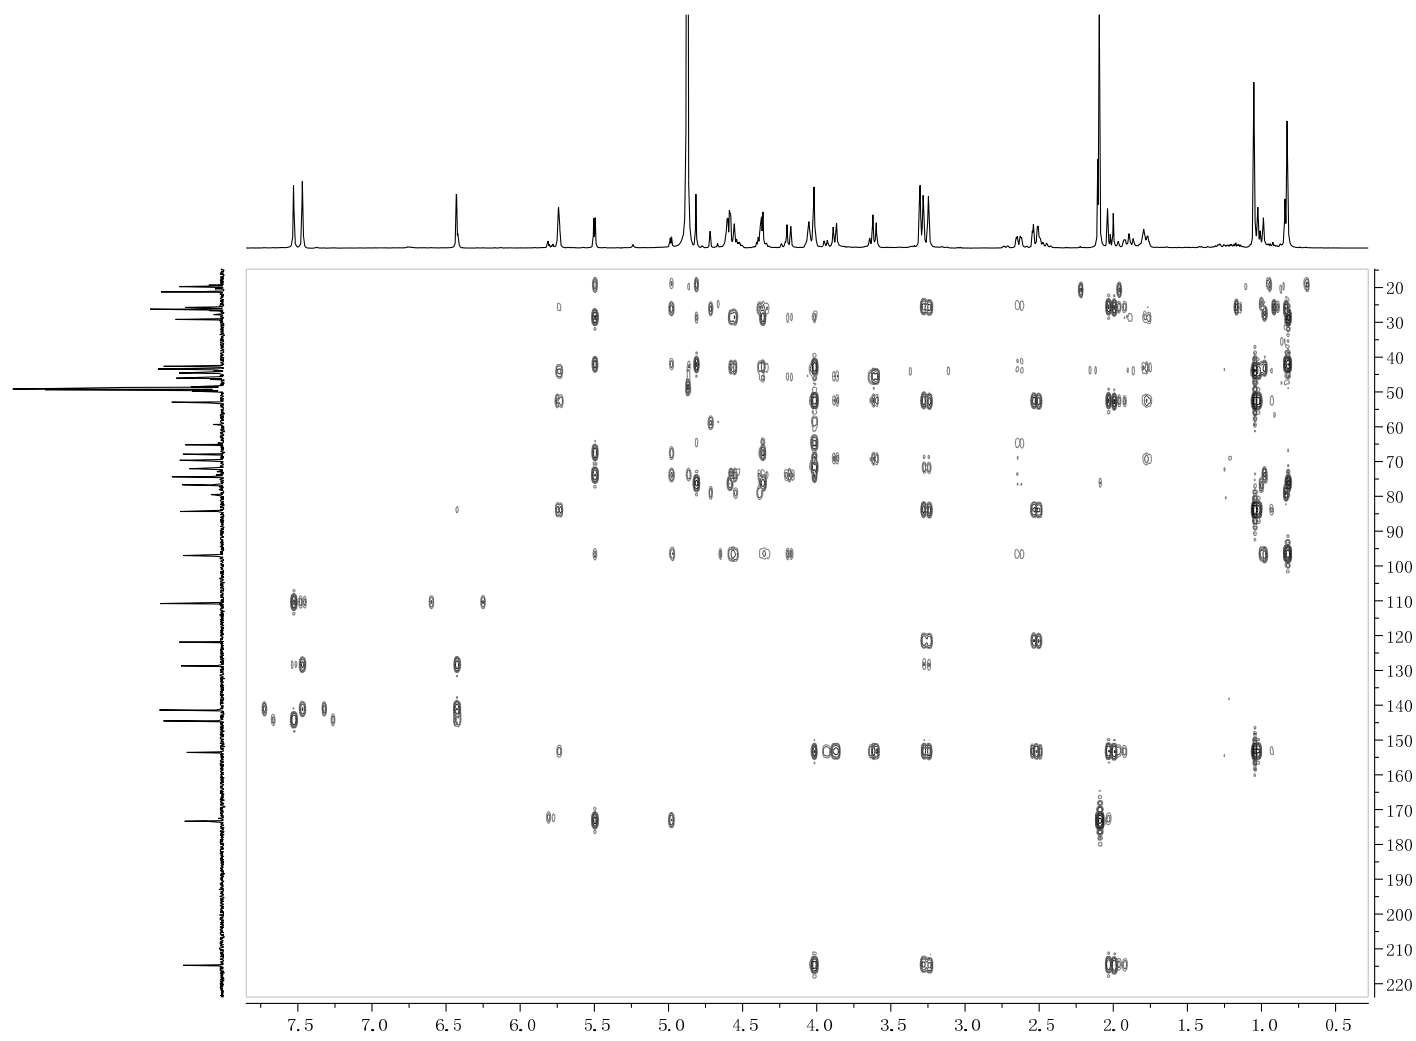

**Fig. 13S** HMBC spectrum of flexuosoid B (2) in methanol- $d_4$

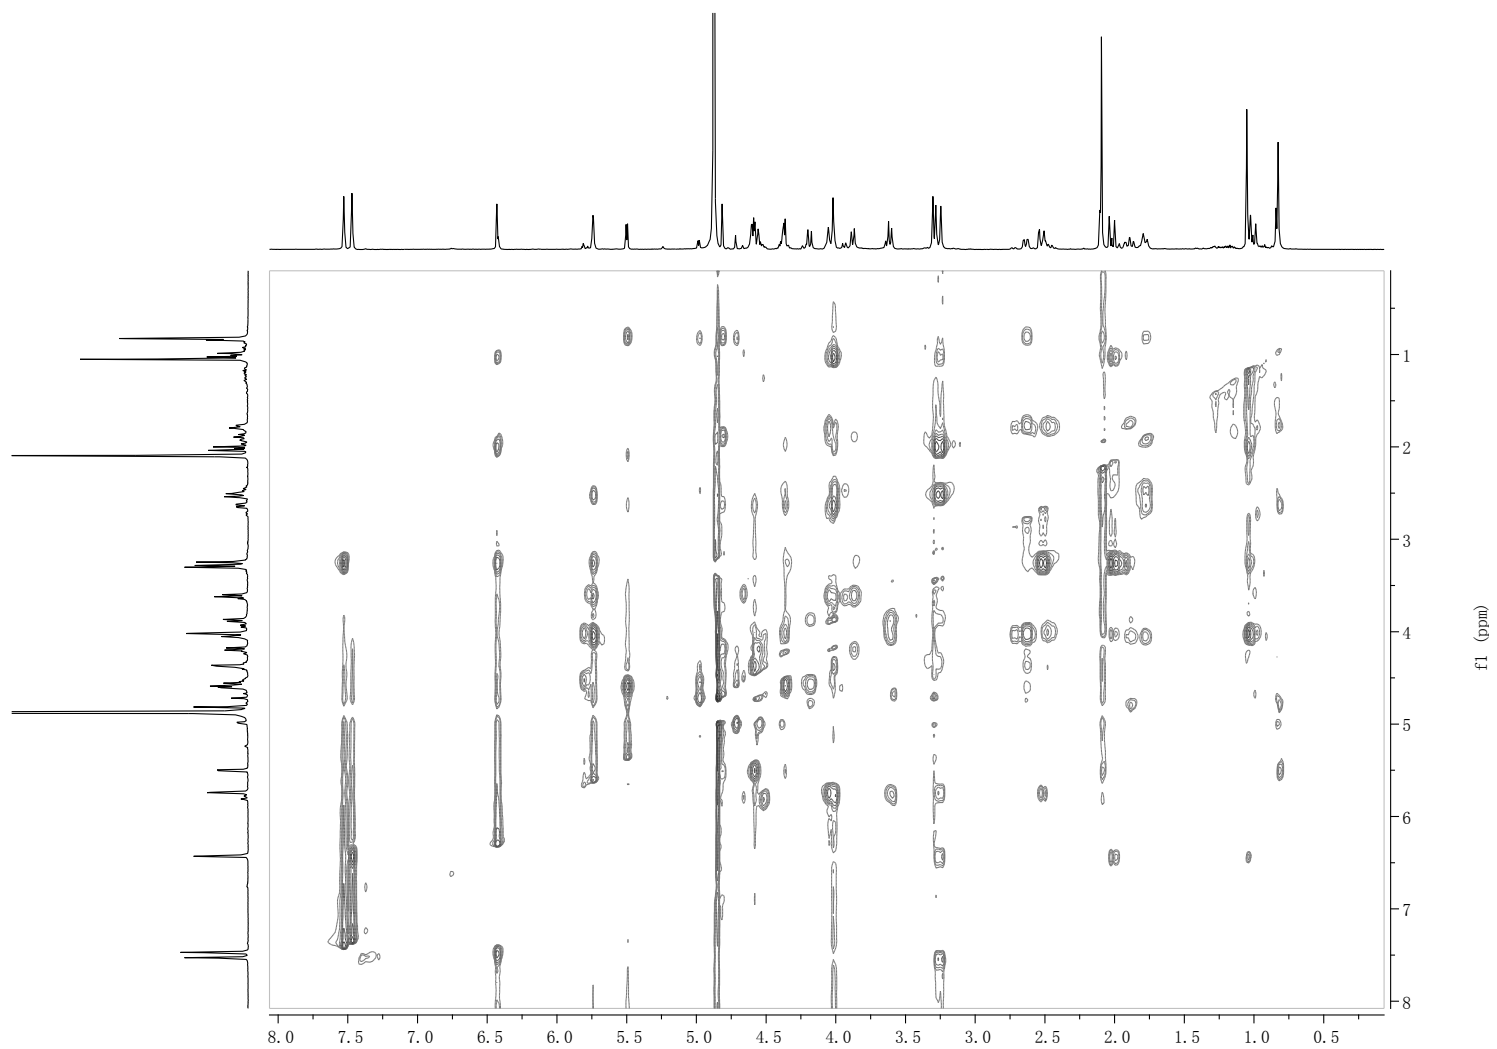

**Fig. 14S** ROESY spectrum of flexuosoid B (2) in methanol- $d_4$

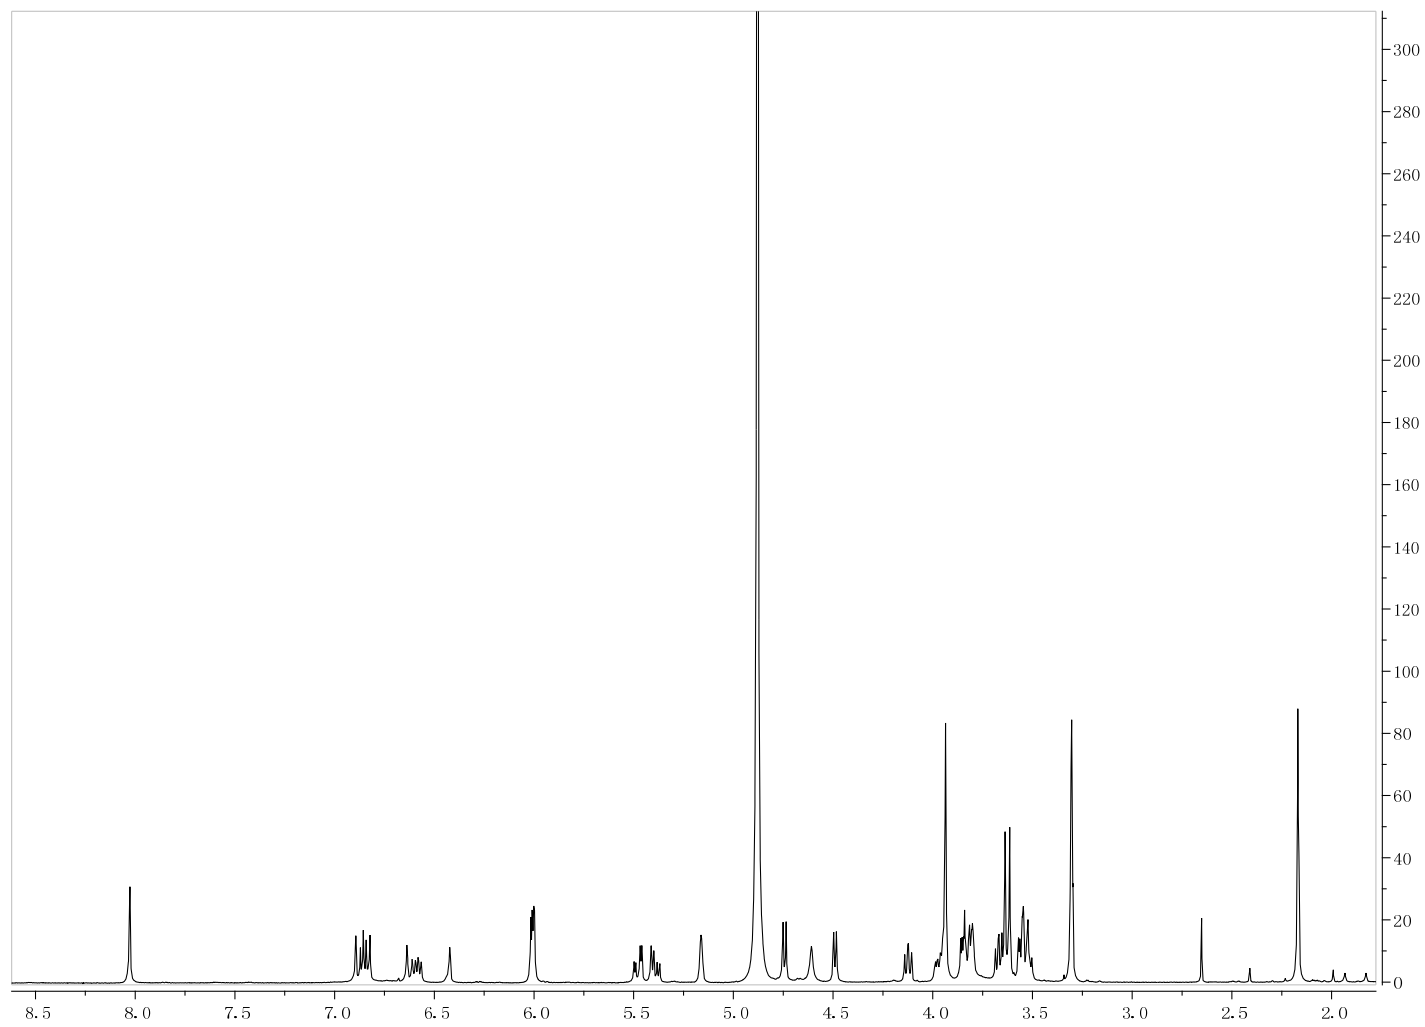

**Fig. 15S**  $^1\text{H}$  NMR spectrum of phyllanthusmin D (3) in methanol- $d_4$

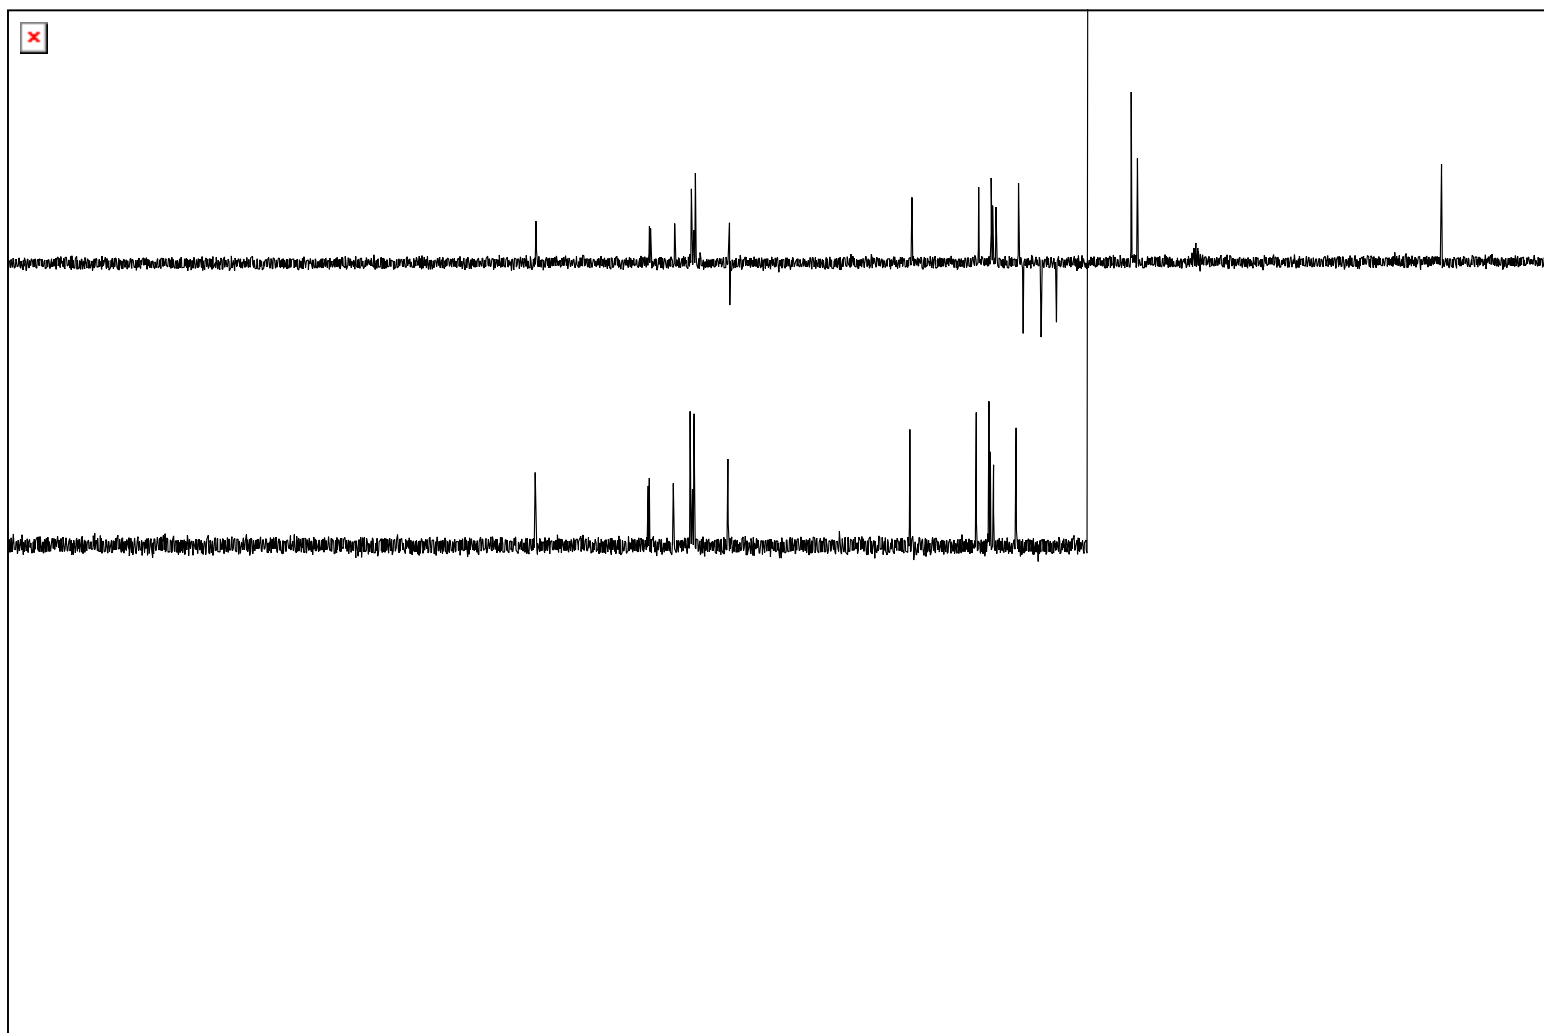

Fig. 16S <sup>13</sup>C NMR and DEPT spectra of phyllanthusmin D (3) in methanol-*d*<sub>4</sub>

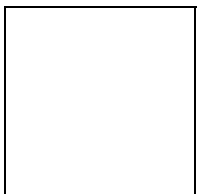

**Fig. 17S** HSQC spectrum of phyllanthusmin D (3) in methanol- $d_4$

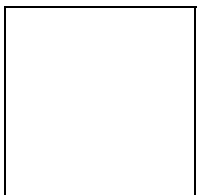

**Fig. 18S**  $^1\text{H}$ - $^1\text{H}$  COSY spectrum of phyllanthusmin D (3) in methanol- $d_4$



**Fig. 19S** HMBC spectrum of phyllanthusmin D (3) in methanol- $d_4$

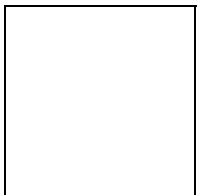

**Fig. 20S** ROESY spectrum of phyllanthusmin D (3) in methanol- $d_4$





**Fig. 21S**  $^1\text{H}$  NMR spectrum of phyllanthusmin E (4) in methanol- $d_4$



**Fig. 22S**  $^{13}\text{C}$  NMR and DEPT spectra of phyllanthusmin E (4) in methanol- $d_4$



**Fig. 23S** HSQC spectrum of phyllanthusmin E (4) in methanol- $d_4$

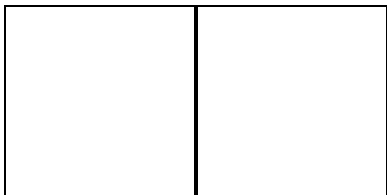

**Fig. 24S** HMBC spectrum of phyllanthusmin E (4) in methanol- $d_4$

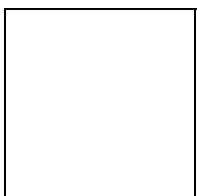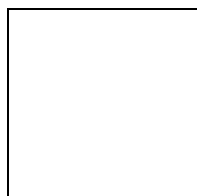

**Fig. 25S** ROESY spectrum of phyllanthusmin E (4) in methanol- $d_4$

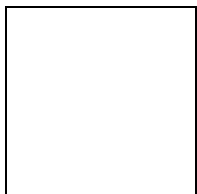

**Fig. 26S**  $^1\text{H}$  NMR spectrum of phyllanthusmin F (5) in pyridine- $d_5$



**Fig. 27S**  $^{13}\text{C}$  NMR and DEPT spectra of phyllanthusmin F (5) in pyridine- $d_5$



**Fig. 28S** HSQC spectrum of phyllanthusmin F (5) in pyridine- $d_5$



**Fig. 29S**  $^1\text{H}$ - $^1\text{H}$  COSY spectrum of phyllanthusmin F (5) in pyridine- $d_5$



**Fig. 30S** HMBC spectrum of phyllanthusmin F (5) in pyridine- $d_5$



**Fig. 31S** ROESY spectrum of phyllanthusmin F (5) in pyridine- $d_5$

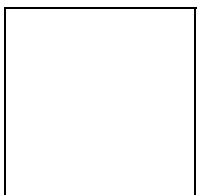

**Fig. 32S**  $^1\text{H}$  NMR spectrum of 1,2,3,7,28,30-hexa-acetyl flexuosoid A (1a) in methanol- $d_4$

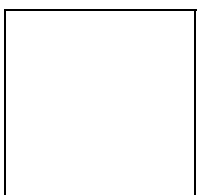

**Fig. 33S**  $^{13}\text{C}$  NMR and DEPT spectra of 1,2,3,7,28,30-hexa-acetyl flexuosoid A (1a) in methanol- $d_4$



**Fig. 34S** HSQC spectrum of 1,2,3,7,28,30-hexa-acetyl flexuosoid A (1a) in methanol- $d_4$



**Fig. 35S**  $^1\text{H}$ - $^1\text{H}$  COSY spectrum of 1,2,3,7,28,30-hexa-acetyl flexuosoid A (1a) in methanol- $d_4$

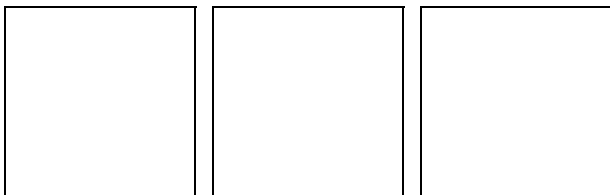

**Fig. 36S** HMBC spectrum of 1,2,3,7,28,30-hexa-acetyl flexuosoid A (1a) in methanol- $d_4$



**Fig. 37S** ROESY spectrum of 1,2,3,7,28,30-hexa-acetyl flexuosoid A (1a) in methanol- $d_4$



**Fig. 38S**  $^1\text{H}$  NMR spectrum of 2,3,7,28,30-penta-acetyl flexuosoid A (1b) in methanol- $d_4$



**Fig. 39S**  $^{13}\text{C}$  NMR and DEPT spectra of 2,3,7,28,30-penta-acetyl flexuosoid A (1b) in methanol- $d_4$



**Fig. 40S** HSQC spectrum of 2,3,7,28,30-penta-acetyl flexuosoid A (1b) in methanol- $d_4$



**Fig. 41S**  $^1\text{H}$ - $^1\text{H}$  COSY spectrum of 2,3,7,28,30-penta-acetyl flexuosoid A (1b) in methanol- $d_4$

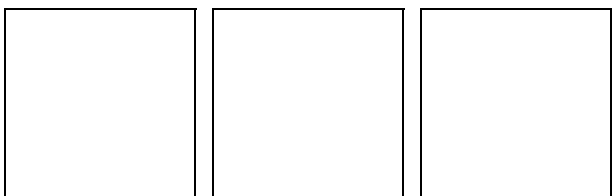

**Fig. 42S** HMBC spectrum of 2,3,7,28,30-penta-acetyl flexuosoid A (1b) in methanol- $d_4$



**Fig. 43S** ROESY spectrum of 2,3,7,28,30-penta-acetyl flexuosoid A (1b) in methanol- $d_4$
